# Supplementary material for: Paradigms on Immunotherapy Combinations with Chemotherapy
Source: Oxford University Press journal article supplement (doi:10.1158/2159-8290.cd-20-1312), 2021-03-12
Supplement: 21598290cd201312-sup-251285_2_supp_6810814_qm2zw9.xlsx [file 21598290cd201312-sup-251285_2_supp_6810814_qm2zw9.xlsx]

## Sheet: Hoja1
INDICATION	STAGE	PHASE	CHEMOTHERAPY AGENT	IMMUNOTHERAPY AGENT	NTC	CLINICAL EFFICACY	REF	FDA Approval	Clinical benefit	Status
Breast HR+	MTS 3L	II	Gem	Pembrolizumab	NCT03025880	ORR 15%; PFS 3,1m; OS 7,9m	ESMO IO 2019. Abstr 102P			Active, not recruiting
Breast HR+	MTS 3L	II	Eribulin	Pembrolizumab	NCT03222856	ORR 36%; PFS 6,03m	Cancer Res 2020;80(4 Suppl):Abstract nr P3-09-03			Active, not recruiting
Breast HR+	MTS 3L	I	Peg-Lipos Doxor	Pembrolizumab	NCT03591276	No results available	Oncology Pipeline*			Recruiting
Breast HR+	MTS 2L	II	Eribulin	Nivolumab	NCT04061863	No results available	Oncology Pipeline			Recruiting
Breast HER2-	MTS 1L	II	Pacl + Bev	Nivolumab	WJOG9917BTR	ORR 75%; PFS 76% at 1 year; OS 87% at 1 year	Cancer Res 2020;80(4 Suppl):Abstract nr PD1-03			Ongoing
Breast HER2-	MTS 2L	I	Eribulin	Durvalumab	NCT03430518	ORR 55%; PFS 6,2m (results mixed with ovarian cancer patients)	J Clin Oncol 38: 2020 (suppl; abstr e15120)	NO	YES	Completed
Breast HER2-	NeoAd	II	Pacl + Cyclopho + Adriam	Pembrolizumab	NCT01042379	pCR 44% vs 17%	JAMA Oncol. 2020;6(5):676-684	NO	YES	Recruiting
Breast HER2+	MTS 2L	I	Trast-Deruxtecan	Pembrolizumab	NCT04042701	No results available	J Clin Oncol 38: 2020 (suppl; abstr TPS1100)			Recruiting
Breast HER2+	MTS 2L	I	Trast-Deruxtecan	Nivolumab	NCT03523572	No results available	Annals of Oncology (2018) 29 (suppl_8): viii90-viii121			Recruiting
Breast HER2+	NeoAd	II	AC + Doce + Carb + Trast + Pert	Atezolizumab	NCT03894007	No results available	J Clin Oncol 38: 2020 (suppl; abstr TPS605)			Recruiting
Breast HER2+	NeoAd	II	Doce + Trast + Pert	Atezolizumab	NCT03881878	No results available	Cancer Res 2020;80(4 Suppl):Abstract nr OT2-01-04			Not yet recruiting
Breast HER2+	MTS 2L	II	Pacl + Trast + Pert	Atezolizumab	NCT03125928	No results available	Oncology Pipeline			Recruiting
Breast HER2+	MTS 2L	II	Trast-Emtansine	Atezolizumab	NCT02924883	ORR 45%; PFS 8,2m;	Cancer Res 2019;79(4 Suppl):Abstract nr PD3-01	NO	NO	Completed
Breast TN	MTS 3L	II	Nab-Pacl	Pembrolizumab	NCT02752685	No results available	Cancer Res 2018;78(4 Suppl):Abstract nr OT1-03-07			Recruiting
Breast TN	MTS 2L	II	Nab-Pacl/ Carb	Pembrolizumab	NCT03121352	No results available	Oncology Pipeline			Completed
Breast TN	MTS 1L	I/II	Eribulin	Pembrolizumab	NCT02513472	ORR 23,4%; PFS 4,1m OS 16,1m	J Clin Oncol 38: 2020 (suppl; abstr 1015)			Active, not recruiting
Breast TN	NeoAd	II	Nab-Pacl/ Epi/ Cyclopho	Pembrolizumab	NCT03289819	Not available	J Clin Oncol 38: 2020 (suppl; abstr e12647)			Active, not recruiting
Breast TN	MTS 1L	II	Tesetaxel	Nivolumab/Pembrolizumab/Atezolizumab	NCT03952325	No results available	J Clin Oncol 38: 2020 (suppl; abstr TPS1111)			Recruiting
Breast TN	MTS 1L	II	Pacl + Bev	Atezolizumab	NCT04408118	No results available	Oncology Pipeline			Not yet recruiting
Breast TN	MTS 2L	I	Nab-Pacl+ Cryoablation	Atezolizumab	NCT04249167	No results available	Oncology Pipeline			Not yet recruiting
Breast TN	MTS 1L	II	Nab-Pacl/Sacituzumab-Govitecan	Atezolizumab	NCT03424005	No results available	Oncology Pipeline			Recruiting
Breast TN	MTS 2L	I	Cape/Gem + Carb/Eribulin/Nab-Pacl/Ipatasertib/Bev/Selicrelumab/Tocilizumab/Sacituzumab Govitecan/SGN-LIV1A	Atezolizumab	NCT03424005	No results available	Cancer Res 2019;79(4 Suppl):Abstract nr OT2-06-04			Recruiting
Breast TN	MTS 1L	I	Pacl/Nab-Pacl + Ipatasertib	Atezolizumab	NCT03800836	ORR 76%	Cancer Res 2019;79(13 Suppl):Abstract nr CT049			Recruiting
Breast TN	MTS 1L	II	Pacl/Nab-Pacl + Cobimetinib	Atezolizumab	NCT02322814	ORR 34%/29%; PFS 6-mo 40,5%/50,1%; OS 6-mo84,1%/90%	J Clin Oncol 37, 2019 (suppl; abstr 1013)	NO	YES (Safety)	Active, not recruiting
Breast TN	NeoAd	II	Nab-Pacl/ Epi/ Cyclopho	Durvalumab	NCT02685059	pCR 53,4% vs 44,2%	Ann Oncol. 2019;30(8):1279-1288.	NO	NO	Unknown
Breast TN	MTS 1L	I	Sacituzumab-Govitecan	Durvalumab		No results available	Oncology Pipeline			Ongoing
Breast inflamatory	MTS 2L	II	Eribulin + Cobimetinib	Atezolizumab	NCT03202316	No results available	Cancer Res 2019;79(4 Suppl):Abstract nr OT3-05-04			Recruiting
Breast lobular	MTS 2L	II	Carb	Atezolizumab	NCT03147040	No results available	Oncology Pipeline			Recruiting
Bladder	MTS 2L	I	Gem or Doce	Pembrolizumab	NCT02437370	ORR 45% PFS 7m	J Clin Oncol 36, 2018 (suppl; abstr 4541)			Recruiting
Bladder	Locally advanced	II	Gem + RT	Pembrolizumab	NCT02621151	No results available	Oncology Pipeline			Recruiting
Bladder	MTS 2L	II	Nab-Pacl	Pembrolizumab	NCT03464734	ORR 48% PFS 5m	J Clin Oncol 38: 2020 (suppl; abstr 5017)			Unknown
Bladder	MTS 2L	I	Trast-Deruxtecan	Nivolumab	NCT03523572	No results available	Annals of Oncology (2018) 29 (suppl_8): viii90-viii121			Recruiting
Bladder	MTS 2L	II	Eribulin	Atezolizumab	NCT03237780	No results available	Oncology Pipeline			Suspended
Bladder	MTS 2L	II	Pem	Avelumab	NCT03744793	No results available	Oncology Pipeline			Recruiting
Bladder	MTS 1L	II	Cis + Gem	Avelumab	NCT03324282	No results available	Oncology Pipeline			Recruiting
Bladder	MTS 1L	II	Gem + Cis	Ipilimumab	NCT01524991	ORR 69%; OS at 1-year 61%	Eur Urol. 2018 May;73(5):751-759	NO	NO	Completed
Cervix	NeoAd	I	Chemoradiotherapy (Cis)	Ipilimumab	NCT01711515	ORR 81% at 12m; OS 90% at 12m	JAMA Oncol. 2020;6(1):92-99	NO	YES	Active, not recruiting
Cholangiocarcinoma	MTS 1L	II	Gem + Tegafur	Nivolumab	NCT04172402	No results available	Oncology Pipeline			Not yet recruiting
Cholangiocarcinoma	MTS 2L	I/II	Nal-Irino + 5-FU + Leucovorin	Nivolumab	NCT03785873	No results available	J Clin Oncol 37, 2019 (suppl; abstr TPS4154)			Suspended
Cholangiocarcinoma	MTS 2L	I/II	FOLFOX-Bev	Atezolizumab	EudraCT: 2018-000257-45	No results available				Not yet recruiting
Cholangiocarcinoma	NeoAd	II	Gem + Cis	Durvalumab	NCT04308174	No results available	Oncology Pipeline			Not yet recruiting
CRC	MTS 2L	II	Cape/ Bev	Pembrolizumab	NCT03396926	No results available	Oncology Pipeline			Recruiting
CRC	MTS 2L	II	5-FU/ Oxali/ Irino/ Binimetinib	Pembrolizumab	NCT03374254	No results available	Annals of Oncology (2019) 30 (suppl_5): v198-v252			Recruiting
CRC	MTS 2L	I/II	Cetuximab	Pembrolizumab	NCT02713373	ORR 5%; PFS 4,1m; OS 14,9m	Ann Oncol. 2020;31:S140			Active, not recruiting
CRC	MTS 3L	II	Temoz + Cis	Nivolumab	NCT04457284	No results available	Oncology Pipeline			Not yet recruiting
CRC	MTS 1L	II	FOLFOXIRI + Bev	Nivolumab	NCT04072198	No results available	J Clin Oncol 38: 2020 (suppl; abstr TPS4118)			Recruiting
CRC	MTS 2L	II	Regorafenib +/- Irino + RT	Nivolumab	NCT04030260	No results available	Oncology Pipeline			Recruiting
CRC	MTS 1L	II	SOC	Nivolumab	NCT03414983	No results available	J Clin Oncol 37, 2019 (suppl 4; abstr TPS718)			Active, not recruiting
CRC	MTS 1L	II	FOLFOXIRI + Bev	Atezolizumab	NCT03721653	No result available	Oncology Pipeline			Recruiting
CRC	NeoAd	II	5-FU + Oxali + Leucovorin +Bev	Atezolizumab	NCT03698461	No results available	Oncology Pipeline			Recruiting
CRC	MTS 2L	II	Cape + Bev	Atezolizumab	NCT02873195	ORR 8,5%; PFS 4,4m; OS 52% at 1 year	Annals of Oncology (2019) 30 (suppl_5): v198-v252	NO	YES	Active, not recruiting
CRC	MTS 1L	II	Cape or Cape + Bev/ Cobi	Atezolizumab	NCT02291289	No results available	Oncology Pipeline			Active, not recruiting
CRC	NeoAd	II	Chemo-Radiotherapy (Cape)	Avelumab	NCT03854799	No results available	Annals of Oncology (2019) 30 (suppl_5): v198-v252			Recruiting
CRC	MTS 2L	II	Irino + Cetuxi	Avelumab	NCT03608046	No results available	Oncology Pipeline			Recruiting
CRC	MTS 1L	II	FOLFOX-Cetuxi	Avelumab	NCT03174405	ORR 79,5%	J Clin Oncol 38, 2020 (suppl 4; abstr 96)	NO	YES	Active, not recruiting
CRC	MTS 1L	II	FOLFOX-Bev + Oleclumab	Durvalumab	NCT04068610	No results available	Oncology Pipeline			Active, not recruiting
Gastric	MTS 1L	II	Cape/ Oxali	Pembrolizumab	NCT04249739	No results available	Oncology Pipeline			Not yet recruiting
Gastric	MTS 1L	II	Pacl/ Olaparib	Pembrolizumab	NCT04209686	No results available	Oncology Pipeline			Recruiting
Gastric	MTS 1L	II	S-1/ Oxali	Pembrolizumab	NCT03382600	ORR 72,2%; PFS 9,4m OS not reached	Eur J Cancer. 2020 Apr;129:97-106			Active, not recruiting
Gastric	MTS 1L	I/II	Cis/ Cape/ Trast	Pembrolizumab	NCT02901301	ORR 76,7%; PFS 8,6m; OS 18,4m	J Clin Oncol 38: 2020 (suppl; abstr 3081)			Active, not recruiting
Gastric	NeoAd	II	CAPOX	Sintilimab	NCT04263870	No results available	Oncology Pipeline			Not yer recruiting
Gastric	MTS 1L	I	CAPOX/Tegafur + Oxali + Trast	Nivolumab	UMIN000034222	Safety result positives	J Clin Oncol 38: 2020 (suppl; abstr 4525)			Ongoing
Gastric	MTS 2L	II	Pacl + Ramucirumab	Nivolumab	UMIN000025947	ORR 37%; PFS 5,1m	Ann Oncol. 2019;30:iv122			Ongoing
Gastric	MTS 1L	II	Trast-Deruxtecan + Cape	Durvalumab	NCT04379596	No results available	Oncology Pipeline			Recruiting
Gastric	NeoAd	II	Doce + Tegafur + Oxali	Durvalumab	NCT04221555	No results available	Oncology Pipeline			Not yet recruiting
Gastric	MTS 2L	II	Pacl + Ramucirumab	Avelumab	AIO-STO-0218	No results available	J Clin Oncol 37, 2019 (suppl; abstr TPS4148)			Recruiting
Gastric	MTS 1L	II	FOLFOX + Trast	Avelumab	NCT03783936	No results available	Oncology Pipeline			Recruiting
Glioblastoma	Newly diagnosed	II	Temoz + RT	Atezolizumab	NCT03174197	PFS 9,7m; OS 17,1m	J Clin Oncol 38: 2020 (suppl; abstr 2511)	NO	YES	Active, not recruiting
Glioblastoma	MTS 1L	II	Temoz	Nivolumab	NCT04195139	No results available	Neuro Oncol. 2018;20(suppl_6):vi235-vi235			Recruiting
Glioblastoma	MTS 1L	II	Temoz + RT	Nivolumab	NCT04267146	No results available	Oncology Pipeline			Recruiting
Glioblastoma	MTS 2L	II	Temoz	Ipilimumab	IPI-GLIO		Oncology Pipeline			On hold
HNC	Locally advanced	II	Gem + Cis + RT	Nivolumab	NCT03984357	No results available	Oncology Pipeline			Not yer recruiting
HNC	Locally advanced	II	Nab-Pacl + Carb	Nivolumab	NCT03107182	No results available	Oncology Pipeline			Recruiting
HNC	Locally advanced	I	Cis/Cetuxi + RT	Nivolumab	NCT02764593	No mature results	J Clin Oncol 37, 2019 (suppl; abstr 6073)			Active, not recruiting
HNC	NeoAd	II	Carb + Nab-Pacl	Durvalumab	NCT03174275	No results available	Oncology Pipeline			Recruiting
Esophagus	MTS 1L	II	Cis/ Cape/ Trast	Pembrolizumab	NCT02954536	ORR 83%; PFS 11,4m	Lancet Oncol. 2020 Jun;21(6):821-831			Recruiting
Esophagus	Locally advanced	II	Cis + 5-FU + Cetuxi + RT	Nivolumab	NCT04229459	No results available	Oncology Pipeline			Recruiting
NSCLC	MTS 1L	II	Platinum doublets/ Bev	Pembrolizumab	NCT04137588	No results available	Oncology Pipeline			Recruiting
NSCLC EGFR/ALK	MTS 2L	II	Platinum-based doublet	Pembrolizumab	NCT03242915	No results available	Oncology Pipeline			Recruiting
NSCLC	MTS 1L	I/II	Nab-Pacl	Pembrolizumab	NCT02733250	No results available	Oncology Pipeline			Active, not recruiting
NSCLC	MTS 1L	II	Nab-Paclconsolidation	Pembrolizumab	NCT02684461	No results available	Oncology Pipeline			Active, not recruiting
NSCLC	MTS 1L	II	Carb/ Pem or Pacl	Pembrolizumab	NCT02591615	Arm A (Ch followed by P): ORR 38%; PFS 5,5m; OS 19,8 m. Arm B (P followed by Ch): ORR 36%; PFS 2,7m; OS 13,1m	J Clin Oncol 37, 2019 (suppl; abstr 9088)	NO	Higher PFS in >50% PD-L1 in Arm A vs Arm B	Active, not recruiting
NSCLC	MTS 1L	I/II	Carb/ Nab-Pacl	Pembrolizumab	NCT02382406	ORR 28%; PFS 5,6m; 15,7m Negative	J Thorac Oncol. 2019;14(10):S385-S386	NO	NO	Active, not recruiting
NSCLC	MTS 2L	II	Doce/ Ramucirumab	Pembrolizumab	NCT04340882	No results available	Oncology Pipeline			Recruiting
NSCLC	MTS 2L	I/II	Maintenance with Ruparib + Pem after Carb + Pem	Pembrolizumab	NCT03559049	No results available	Oncology Pipeline			Recruiting
NSCLC	MTS 2L	I	Trast-Deruxtecan	Pembrolizumab	NCT04042701	No results available	J Clin Oncol 38: 2020 (suppl; abstr TPS1100)			Recruiting
NSCLC	MTS 1L	II	Carb + Pem	Durvalumab	NCT04163432	No results available	Oncology Pipeline			Not yet recruiting
NSCLC	MTS 1L	II	Carb + Nab-Pacl / Gem / Vinorelbine	Durvalumab	NCT03345810	No results available	Annals of Oncology (2018) 29 (suppl_8): viii493-viii547			Recruiting
NSCLC	MTS 2L	II	Trast-Deruxtecan	Durvalumab	NCT03334617	No results available	J Thorac Oncol. 2018;13(10):S677			Recruiting
NSCLC	Locally advanced	II	SBRT+ ChT-RT	Durvalumab	NCT03141359	No mature results	J Clin Oncol 38: 2020 (suppl; abstr e21047)			Recruiting
NSCLC	MTS 2L	II	Nab-Pacl	Nivolumab	NCT02967133	No results available	Oncology Pipeline			Active, not recruiting
NSCLC	MTS 2L	II	Gem	Atezolizumab	NCT04480372	No results available	Oncology Pipeline			Not yet recruiting
NSCLC	MTS 1L	II	Carb + Pem + Bev	Atezolizumab	NCT03713944	No results available	Oncology Pipeline			Recruiting
NSCLC	MTS 1L	II	Platinum-based doublet + Veliparib	Nivolumab	NCT02944396	ORR 27%	J Clin Oncol 36, 2018 (suppl; abstr 3061)	NO	YES	Completed
NSCLC	NeoAd	II	Nab-Pacl + Carb	Atezolizumab	NCT02716038	Pathological complete response: 57%	Lancet Oncol. 2020;21(6):786-795.	NO	YES	Active, not recruiting
NSCLC	MTS 2L	I	Anetumab-Ravtansine	Atezolizumab	NCT03455556	No results available	Oncology Pipeline			Completed
NSCLC	MTS 1L	I	Carb + Pem/ Carb + Pacl/ Carb + Nab-Pacl	Atezolizumab	NCT01633970	ORR 36% (cb/pac), 68% (cb/pem), 46% (cb/nab-p). PFS 7,1m, 8,4m, 5,7m, respectively. OS 12,9m, 18,9m, 17m, respectively	Eur J Cancer. 2018;101:114-122		YES	Active, not recruiting
NSCLC	MTS 1L	II	Carb + Gem + M6620 (ATR inhibitor)	Avelumab	NCT04216316	No results available	Oncology Pipeline			Recruiting
NSCLCsq	MTS 1L	II	Cetuxi + Cis + Gem	Avelumab	NCT03717155	No results available	J Clin Oncol 37, 2019 (suppl; abstr TPS9123)			Active, not recruiting
NSCLC EGFR	MTS 2L	II	Carb/Cis + Pacl/Pem + Bev	Atezolizumab	NCT04147351	No results available	Oncology Pipeline			Recruiting
NSCLC EGFR	MTS 2L	II	Carb + Pem + Bev	Atezolizumab	NCT03647956	No results available	Oncology Pipeline			Recruiting
NSCLC EGFR	MTS 2L	II	Carb + Pacl/Pem + Bev	Atezolizumab	NCT04245085	No results available	Oncology Pipeline			Recruiting
NSCLC EGFR/ALK	MTS 1L	II	Carb + Pem + Bev	Atezolizumab	NCT03786692	No results available	J Clin Oncol 38: 2020 (suppl; abstr TPS9629)			Recruiting
NSCLC EGFR/ALK	MTS 1L	II	Carb + Pem	Nivolumab/ Nivolumab + Ipilimumab	NCT03256136	No results available	Oncology Pipeline			Completed
SCLC	MTS 2L	I/II	Lurbinectedin	Pembrolizumab	NCT04358237	No results available	Oncology Pipeline			Not yet recruiting
SCLC	MTS 1L	II	Etop/Platinum, maintenance with Anlotinib	Nivolumab	NCT04363255	No results available	Oncology Pipeline			Not yet recruiting
SCLC	MTS 1L	II	Platinum-based doublet, maintenance with Rucaparib	Nivolumab	NCT03958045	No results available	Oncology Pipeline			Recruiting
SCLC	MTS 2L	II	Temoz	Nivolumab	NCT03728361	No results available	Oncology Pipeline			Recruiting
SCLC	MTS 2L	II	Lurbinectedin	Atezolizumab	NCT04253145	No results available	Oncology Pipeline			Recruiting
Melanoma	MTS 1L	II	Fotemustine	Ipilimumab	NCT01654692	OS 12,9m; OS 3-years 28,5%	Ann Oncol. 2015;26(4):798-803	NO	YES	Completed
Melanoma	MTS 1L	II	Temoz + Cis + IFN alfa + IL2	Ipilimumab	NCT01409174	ORR 63%; PFS 6,7m; OS 16,2m	J Clin Oncol 33, 2015 (suppl; abstr e20014)	NO	YES	Terminated
Melanoma	MTS 1L	II	Temoz	Ipilimumab	NCT01119508	ORR 28%; PFS 43% at 6m	J Clin Oncol 30, 2012 (suppl; abstr 8514)	NO	YES	Completed
Mesothelioma	NeoAd	I	Carb/Cis + Pem	Nivolumab	NCT04162015	No mature results				Recruiting
Mesothelioma	MTS 2L	II	ADC Mesothelin	Nivolumab	NCT02341625	ORR 31%	Mol Cancer Ther 2019;18(12 Suppl):Abstract nr B057			Active, not recruiting
Mesothelioma	MTS 1L	II	Cis + Pem	Nivolumab	UMIN000030892	No results available	J Thorac Oncol. 2018;13(10):S746			Ongoing
Mesothelioma	MTS 1L	I/II	Anetumab Ravtansine	Pembrolizumab	NCT03126630	No results available	Oncology Pipeline			Recruiting
Mesothelioma	NeoAd	I	Cis + Pem	Atezolizumab	NCT03228537	No results available	Oncology Pipeline			Recruiting
Mesothelioma	MTS 1L	II	Pem + Cis/Carb	Durvalumab	NCT02899195	OS 21,1m	J Clin Oncol 38: 2020 (suppl; abstr 9003)	NO	YES	Active, not recruiting
Mesothelioma	MTS 1L	II	Cis + Pem	Durvalumab	ACTRN12616001170415	ORR 48%; PFS 6,9m	J Thorac Oncol. 2018;13(10):S338-S339	NO	YES	Completed
Ovarian	Platinum-resistant	I	Peg Liposomal Doxo + Bev	Pembrolizumab	NCT03596281	No results available	Oncology Pipeline			Not yet recruiting
Ovarian	Platinum-resistant	II	Peg Liposomal Doxo or Pacl or Gem	Pembrolizumab	NCT03539328	No results available	Oncology Pipeline			Not yet recruiting
Ovarian	Platinum-resistant	II	Peg Liposomal Doxo	Pembrolizumab	NCT02865811	No results available	Oncology Pipeline			Active, not recruiting
Ovarian	Platinum-resistant	II	Metronomic Cycloph + Bev	Pembrolizumab	NCT02853318	No results available	Oncology Pipeline			Active, not recruiting
Ovarian	Platinum-resistant	II	Cis + Gem	Pembrolizumab	NCT02608684	No results available	Oncology Pipeline			Active, not recruiting
Ovarian	Platinum-resistant	I/II	Mirvetuximab-Sravtansine	Pembrolizumab	NCT02606305	ORR 49%; PFS 5,2m	Annals of Oncology (2018) 29 (suppl_8): viii332-viii35			Active, not recruiting
Ovarian	MTS 2L	I	Eribulin	Durvalumab	NCT03430518	ORR 55%; PFS 6,2m (results mixed with breast cancer patients)	J Clin Oncol 38: 2020 (suppl; abstr e15120)	NO	YES	Completed
Ovarian	MTS 2L	I	Trabectedin	Durvalumab	NCT03085225	No results available	Oncology Pipeline			Active, not recruiting
Ovarian	MTS 2L	II	Carb + M6620 (ATR inhibitor)	Avelumab	NCT03704467	No results available	Annals of Oncology (2019) 30 (suppl_5): v403-v434			Completed
PDAC	NeoAd	II	SOC	Pembrolizumab	NCT03727880	No results available	Oncology Pipeline			Recruiting
PDAC	NeoAd	I	Paracalcitol +/- Gem + Nab-Pacl	Pembrolizumab	NCT02930902	No results available	Oncology Pipeline			Active, not recruiting
PDAC	NeoAd	I	Paracalcitol +/- Gem + Nab-Pacl	Nivolumab	NCT03519308	No results available	Oncology Pipeline			Recruiting
PDAC	MTS 2L	I	Gem + Defactinib	Pembrolizumab	NCT02546531	No results available	Oncology Pipeline			Active, not recruiting
PDAC	MTS 1L	I/II	Gem + Nab-Pacl	Pembrolizumab	NCT02331251	PFS 5m; OS 10,3m	Cancer Res 2017;77(13 Suppl):Abstract nr CT134	NO	NO	Terminated
PDAC	MTS 1L	II	Gem + Tegafur	Nivolumab	NCT04377048	No results available	Oncology Pipeline			Not yet recruiting
PDAC	MTS 2L	I	Gem + Anetumab-Ravtansine	Nivolumab/ Nivolumab + Ipilimumab	NCT03816358	No results available	Oncology Pipeline			Recruiting
PDAC	MTS 1L	II	Gem + Nab-Pacl + Cis + Paracalcitol	Nivolumab	NCT02754726	ORR 83%; PFS 8,17m; OS 15,3m	Cancer Res 2019;79(13 Suppl):Abstract nr CT152			Recruiting
PDAC	MTS 1L	II	5-FU + Leucovorin + Onivyde + CXCR4 antagonist	Pembrolizumab	NCT02826486	ORR 32%	Nat Med. 2020 Jun;26(6):878-885	NO	YES	Active, not recruiting
PDAC	Preoperative	II	Gem + Nab-Pacl + Hydroxychloroquine	Avelumab	NCT03344172	Suspended	Oncology Pipeline			Suspended
Prostate	mCRPC	II	Doce	Nivolumab	NCT03338790	ORR 36,8%; PFS 71,5% at 6 months	Annals of Oncology (2019) 30 (suppl_5): v851-v934	NO	YES	Recruiting
Soft Tissue Sarcomas	MTS 2L	II	Eribulin	Pembrolizumab	NCT03899805	ORR 5,3%; PFS 11,1w; OS NR in the follow-up period	J Clin Oncol 38: 2020 (suppl; abstr 11559)	NO	NO (LMS)	Recruiting
Soft Tissue Sarcomas	MTS 1L	I/II	Doxo + Olaratumab	Durvalumab	NCT03802071	No results available	Oncology Pipeline			Recruiting
Soft Tissue Sarcomas	MTS 1L	II	Doxo	Pembrolizumab	NCT02888665	ORR 22%; PFS 8,1m	J Clin Oncol 37, 2019 (suppl; abstr 11009)	NO	NO	Active, not recruiting
Soft Tissue Sarcomas	MTS 1L	I	Trabectedin	Durvalumab	NCT03085225	No results available	Oncology Pipeline			Active, not recruiting
Soft Tissue Sarcomas	MTS 1L	II	Trabectedin	Avelumab	NCT03074318	No results available	Oncology Pipeline			Active, not recruiting
Solid tumors	MTS 2L	II	Cape / Carb / Gem Hydrochloride / Nab-Pacl / Pacl / Peg Liposomal Doxo	Durvalumab	NCT03907475	No results available	Oncology Pipeline			Recruiting
Onology Pipeline* is a web platform for clinical trial consultation that offers information about study design, company, current trial status and clinical/preliminary efficay of study drugs
